# Supplementary material for: LncRNA H19 inhibits ER stress induced apoptosis and improves diabetic cardiomyopathy by regulating PI3K/AKT/mTOR axis
Source: publisher site journal article supplement (doi:10.18632/aging.204256), 2022-08-30
Supplement: Supplementary file [file aging-v14i16-204256-supplementary-material-SD1.pdf]

SUPPLEMENTARY FIGURES

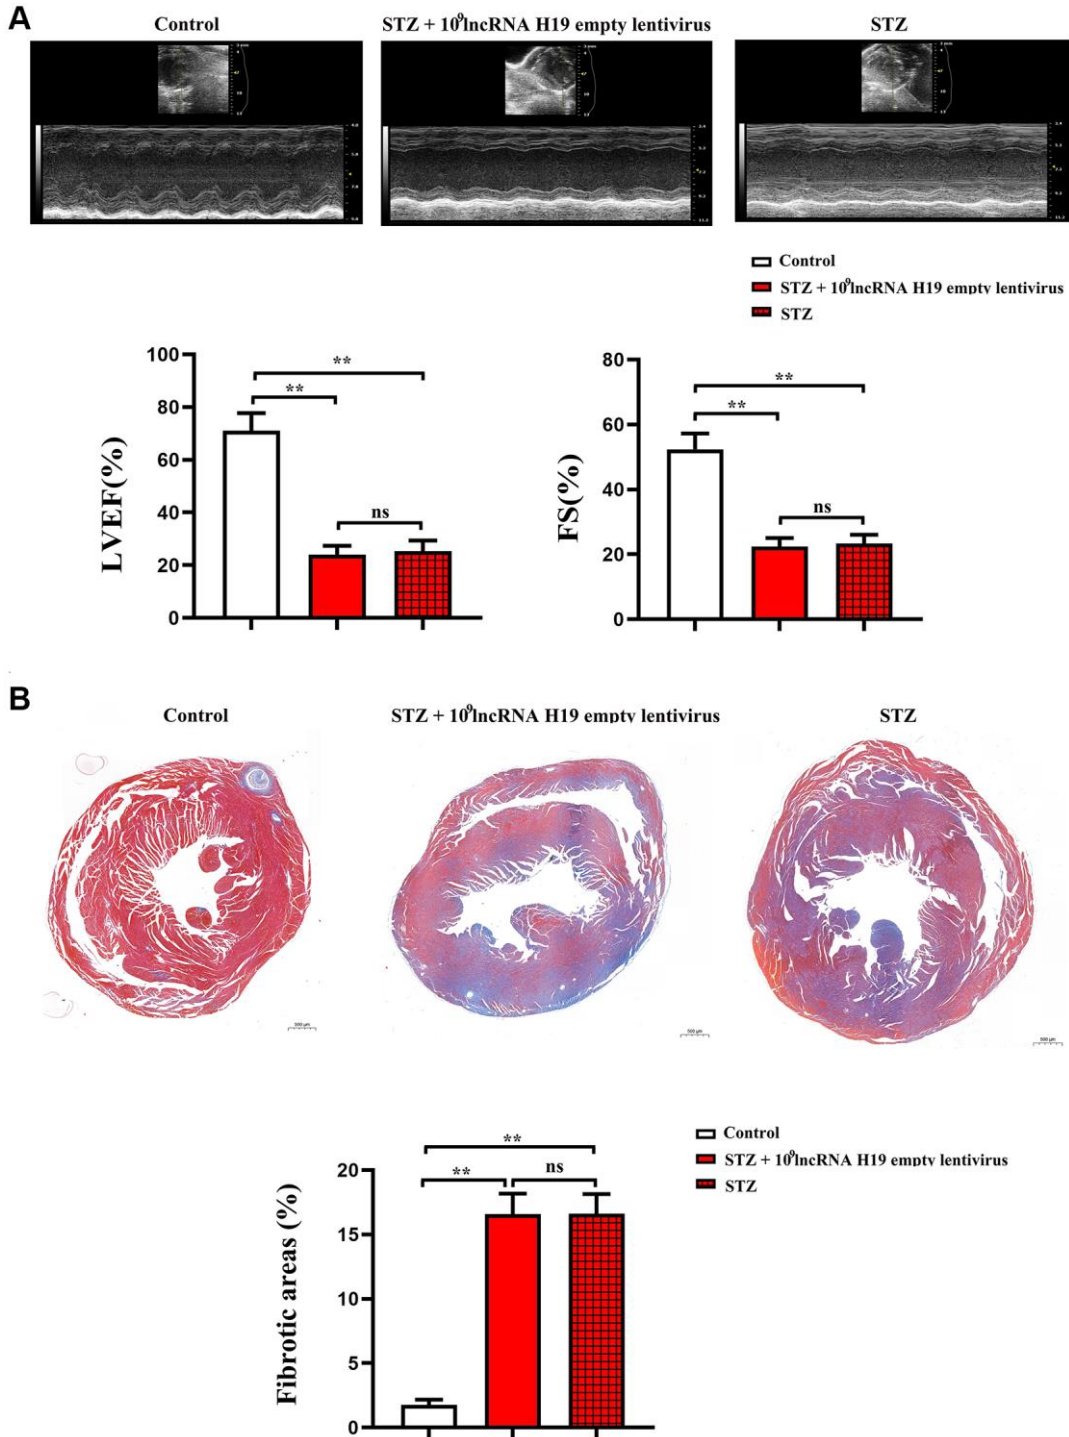

**Supplementary Figure 1. LncRNA H19 empty lentivirus had no effects on the progression of DCM.** (A) There were no significant differences in left ventricular function in STZ + LncRNA H19 empty lentivirus and STZ group, and the 2 groups showed significant decreased LVEF and FS vs. control group. (B) The ratio of fibrotic areas in whole heart were no significant differences in STZ + LncRNA H19 empty lentivirus and STZ group, and the 2 groups showed notable raised ratio of fibrotic areas in heart vs. control group. Data are expressed as mean ± SEM. \**P* < 0.05, \*\**P* < 0.01. STZ+LncRNA H19 empty lentivirus, and STZ group vs. control group, *n* = 6/group.

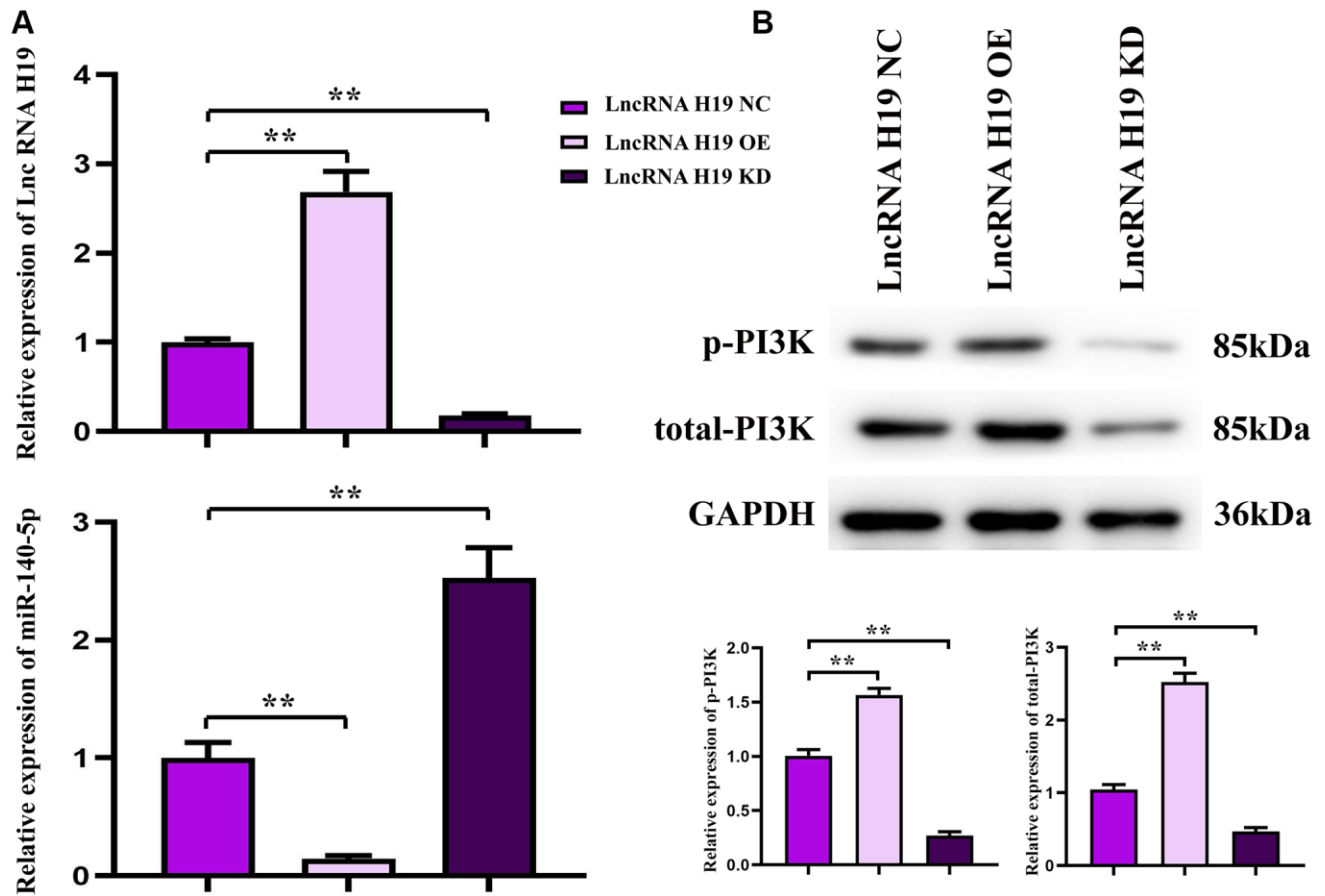

**Supplementary Figure 2. The relationship between lncRNA H19, miR-140-5p and PI3K.** (A) The relative expression levels of lncRNA H19 and miR-140-5p levels in HL-1 cells after infected with lncRNA H19 NC, OE, KD lentivirus. (B) The phosphorylated and total protein levels of PI3K after infecting with lncRNA H19 NC, OE, KD lentivirus. Data are expressed as mean  $\pm$  SEM. \* $P < 0.05$ , \*\* $P < 0.01$ . LncRNA H19 NC group vs. OE and KD group,  $n = 3/\text{group}$ .
